# Supplementary material for: Two novel luminescent lanthanide sulfate–carboxylates with an unusual 2-D bamboo-raft-like structure based on the linkages of left- and right-handed helical tubes involving in situ decarboxylation
Source: Royal Society of Chemistry journal article supplement (doi:10.1039/b602034h), 2006-01-01
Supplement: b602034h.pdf [file b602034h.pdf]

## Two novel luminescent lanthanide sulfate-carboxylates with unusual 2-D bamboo-raft-like structure based on the linkages of left- and right-handed helical tubes involving *in-situ* decarboxylation

Yan-Qiong Sun, Jie Zhang, and Guo-Yu Yang\*

State Key Laboratory of Structural Chemistry, Fujian Institute of Research on the Structure of Matter, Chinese Academy of Sciences, Fuzhou, Fujian 350002, P. R. China. Fax: +86-591-83710051; E-mail: ygy@fjirsm.ac.cn

### Electronic Supplementary Information:

**Table 1.** Geometrical Parameters of Hydrogen Bonds for **1**

| D-H         | d(D-H) | d(H..A) | <DHA | d(D..A) | A                        |
|-------------|--------|---------|------|---------|--------------------------|
| O(1W)-H(11) | 0.84   | 2.06    | 160  | 2.865   | O(4) [-x, y-1/2, -z+3/2] |
| O(1W)-H(12) | 0.83   | 1.95    | 174  | 2.773   | O(2) [-x, -y, -z+1]      |
| N(1)-H(1B)  | 0.86   | 2.34    | 127  | 2.933   | O(4) [x+1, y, z]         |

**Table 2.** Geometrical Parameters of Hydrogen Bonds for **2**

| D-H         | d(D-H) | d(H..A) | <DHA | d(D..A) | A                        |
|-------------|--------|---------|------|---------|--------------------------|
| O(1W)-H(11) | 0.85   | 2.06    | 160  | 2.865   | O(4) [-x, y-1/2, -z+3/2] |
| O(1W)-H(12) | 0.83   | 1.97    | 173  | 2.795   | O(2) [-x, -y, -z+1]      |
| N(1)-H(1B)  | 0.86   | 2.32    | 128  | 2.921   | O(4) [x+1, y, z]         |

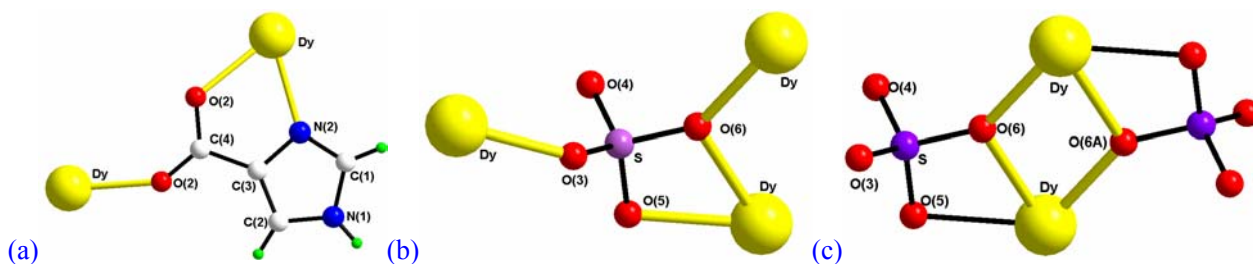

**Figure S1.** Coordination modes of Hime ligand (a), SO<sub>4</sub><sup>2-</sup> anion (b) and the dinuclear cluster (Dy<sub>2</sub>) units (c). Atoms having “A” in their labels are symmetry-generated. A: -x, -y, -z.

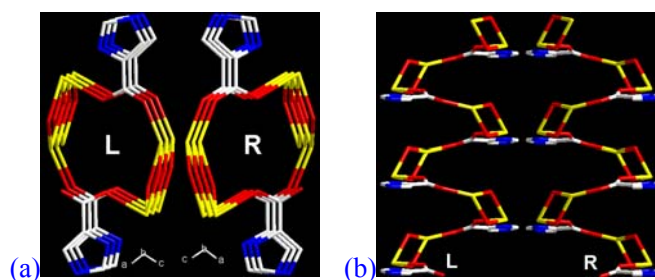

**Figure S2.** (a) View of the left- and right-handed helical chains down the approximate [010] direction; (b) Side view of the left- and right-handed helical chains along the *b* axis.

In the structure, the [Dy<sub>2</sub>O<sub>2</sub>] rhombic dimeric cluster units are linked by the carboxyl groups of O(1)C(4)O(2) through two repeated -[Dy<sub>2</sub>O<sub>2</sub>]-O(1)-C(4)-O(2)- linkages to give rise to left- and right-handed helical channels.

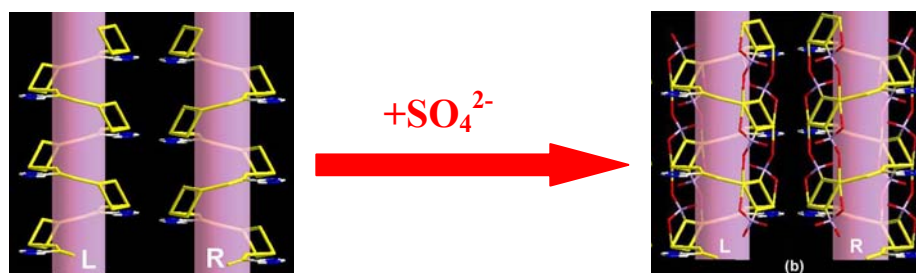

**Figure S3.** Side view of the helical tubes constructed from the helical chains and  $\text{SO}_4^{2-}$  anions. The helical chain of  $-\{[\text{Dy}_2\text{O}_2]\text{-O(1)-C(4)-O(2)}\}_n-$  is marked yellow for identification.

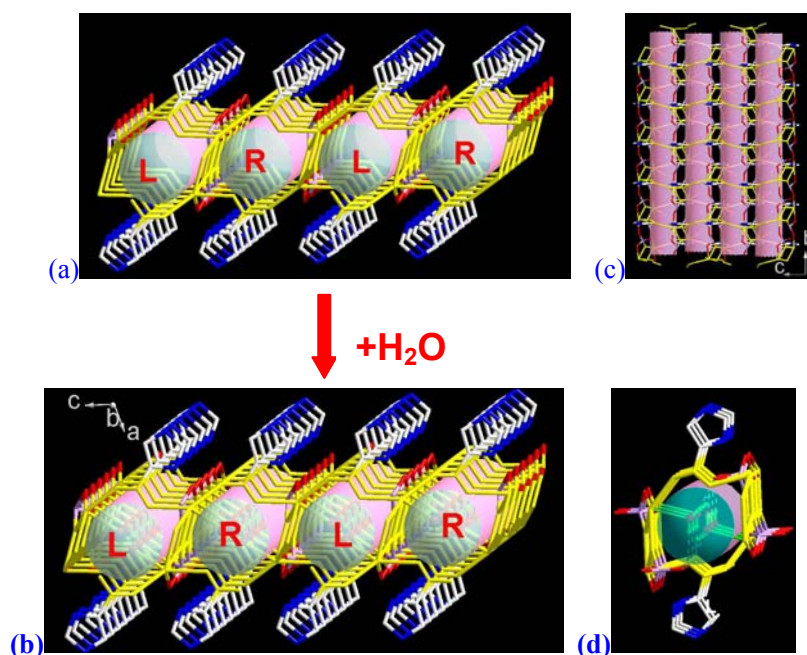

**Figure S4.** View of 2-D bamboo-raft-like structure formed by the alternating assembly of the helical tubes with opposite chirality. (a) The coordinated water molecules are omitted for clarity; (b)/(c) The coordinated water molecules are shown in the helical tubes; (d) In the helical tubes, the H-bonding network between the coordination water molecules and oxygen atoms of  $\text{SO}_4^{2-}$  anions.

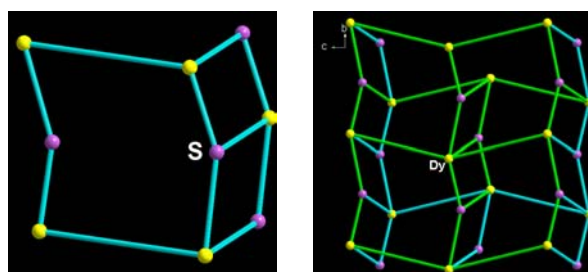

**Figure S5.** (left) Circuits through  $\text{SO}_4^{2-}$  in complex **1**. (right) Circuits through Dy in complex **1**. The shortest circuits are differentiated by color. The Dy atoms are denoted by yellow globes, and the purple globes denote the  $\text{SO}_4^{2-}$  units.

The  $\text{SO}_4^{2-}$  anion can be considered as a 3-connected node. The shortest circuits at three angles of the 3-connected net are two 4-circuits and one 6-circuit. Thus, the  $\text{SO}_4^{2-}$  anion has schläfli symbol  $4^2\cdot6$ . The Dy atom acts as a 5-connected node. The shortest circuits at ten angles of the 5-connected net are two 4-circuits, seven 6-circuits and one eight-circuit. Thus, the Dy atom has schläfli symbol  $4^2\cdot6^7\cdot8$ .
